# Supplementary material for: Tree Removal Changed The Drumming Behaviour of A Japanese Pygmy Woodpecker
Source: Research Square preprint supplement (doi:10.21203/rs.3.rs-1200767/v1), 2022-02-04
Supplement: Supplementary file 1 [file b0ded3735d596c2e1df3cc26.docx]

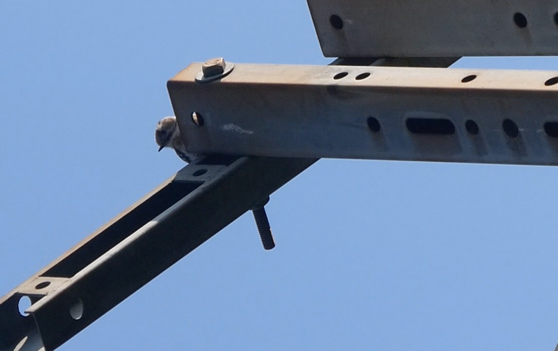


Figure 1- **a,** The bird drumming at the point of the metal plate with the highest sound.


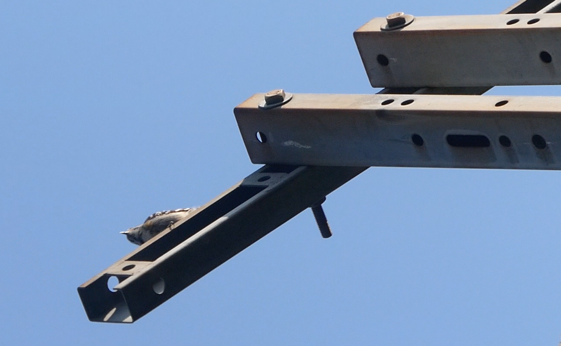


**Figure1-b,** The bird drumming the plate part which created a low-pitched sound.


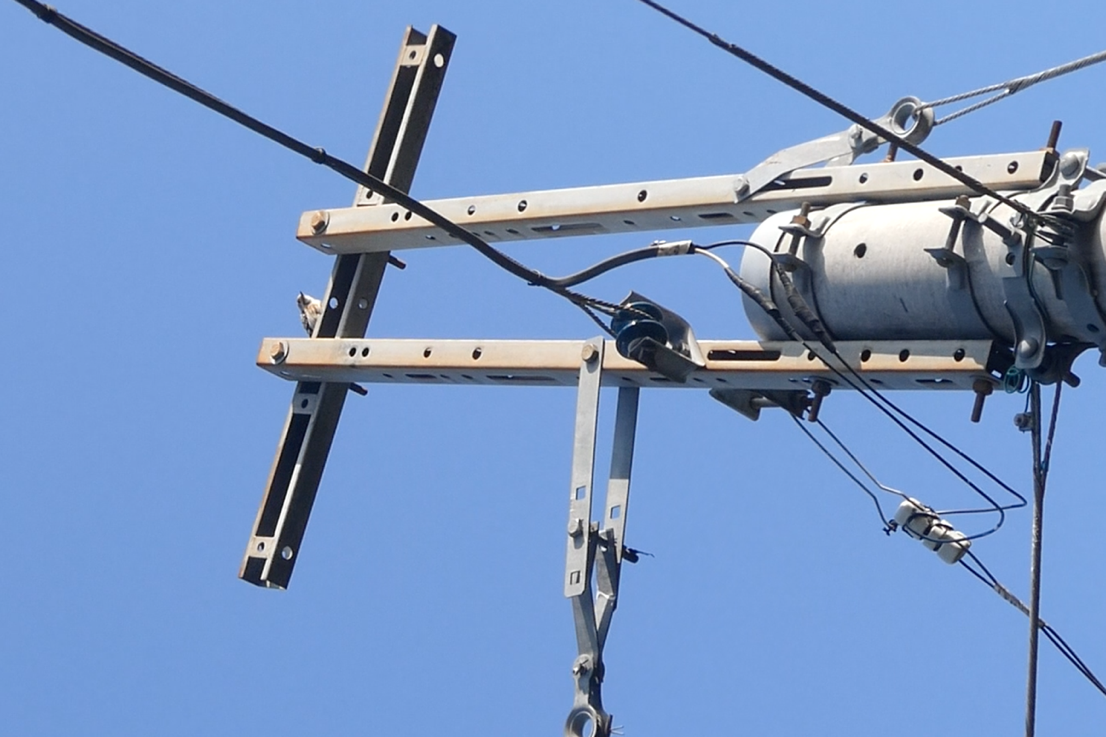


Figure1-**c,** drumming the part with high-pitched sound.

**Extended Data Figure 1:** research area and observation point (blue circle).

**
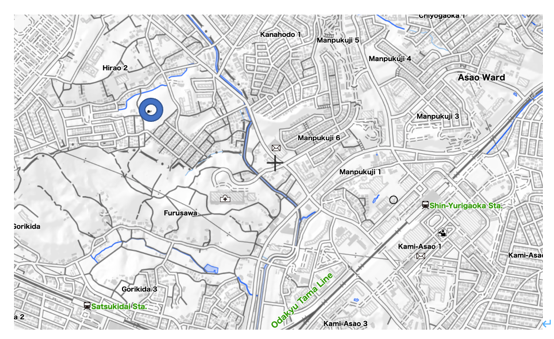
**

**Extended Data Figure 1-a**

（Source: https://maps.gsi.go.jp/multil/index.html#11/35.528315/139.791412/&base=pale2&ls=pale2%7Chillshademap%2C0.1%7Cchuki_eng&blend=0&disp=111&lcd=chuki_eng&vs=c1), and **b**, Photographic map (Source: https://www.google.com/maps/place/〒215-0026+神奈川県川崎市麻生区古沢/@35.6037014,139.4880905,2832m/data=!3m2!1e3!4b1!4m5!3m4!1s0x6018fa4f8c6c2101:0x2322945b7d3b9975!8m2!3d35.6033863!4d139.4968256.)

**
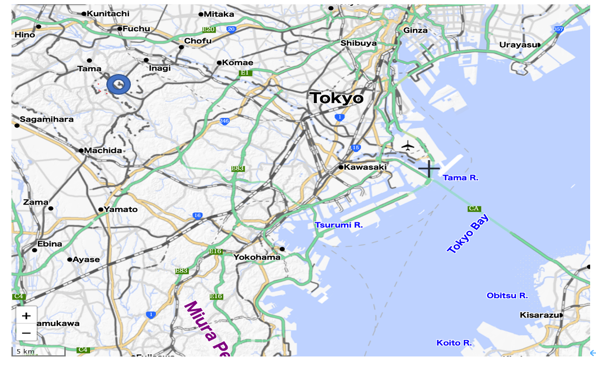
**

**Extended Data Figure 1-b**

**
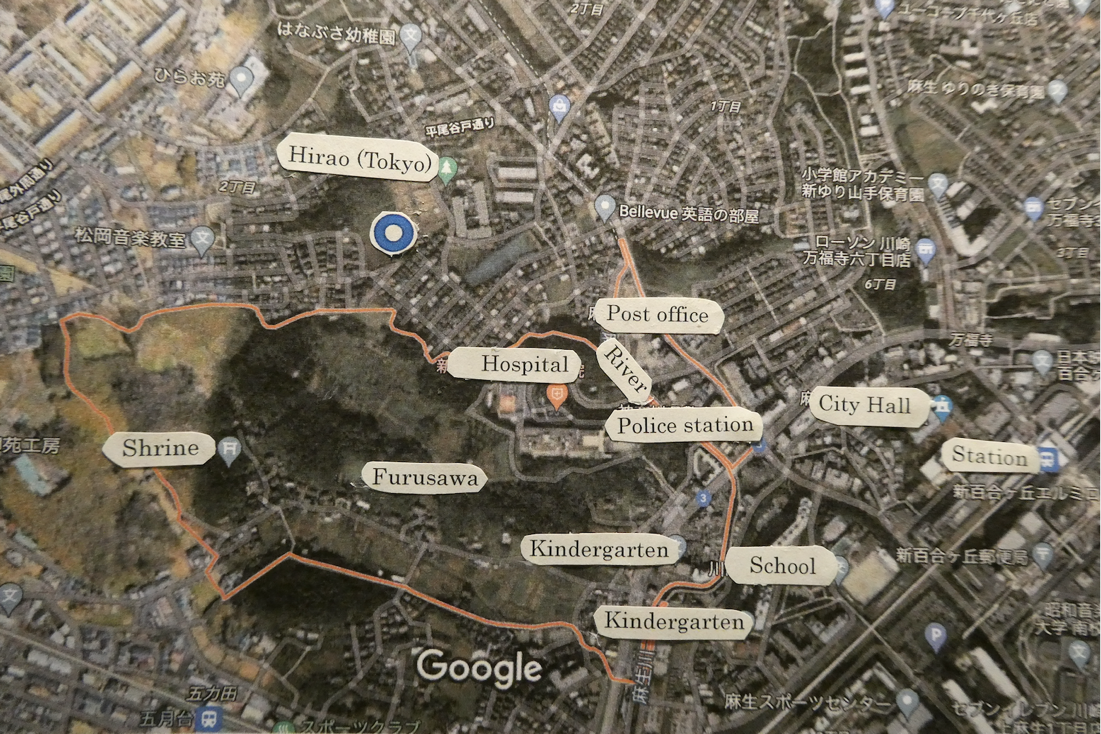
**

**Extended Data Figure 1-c**

**Extended** **data Figure 2:** Pictures of the observation location.


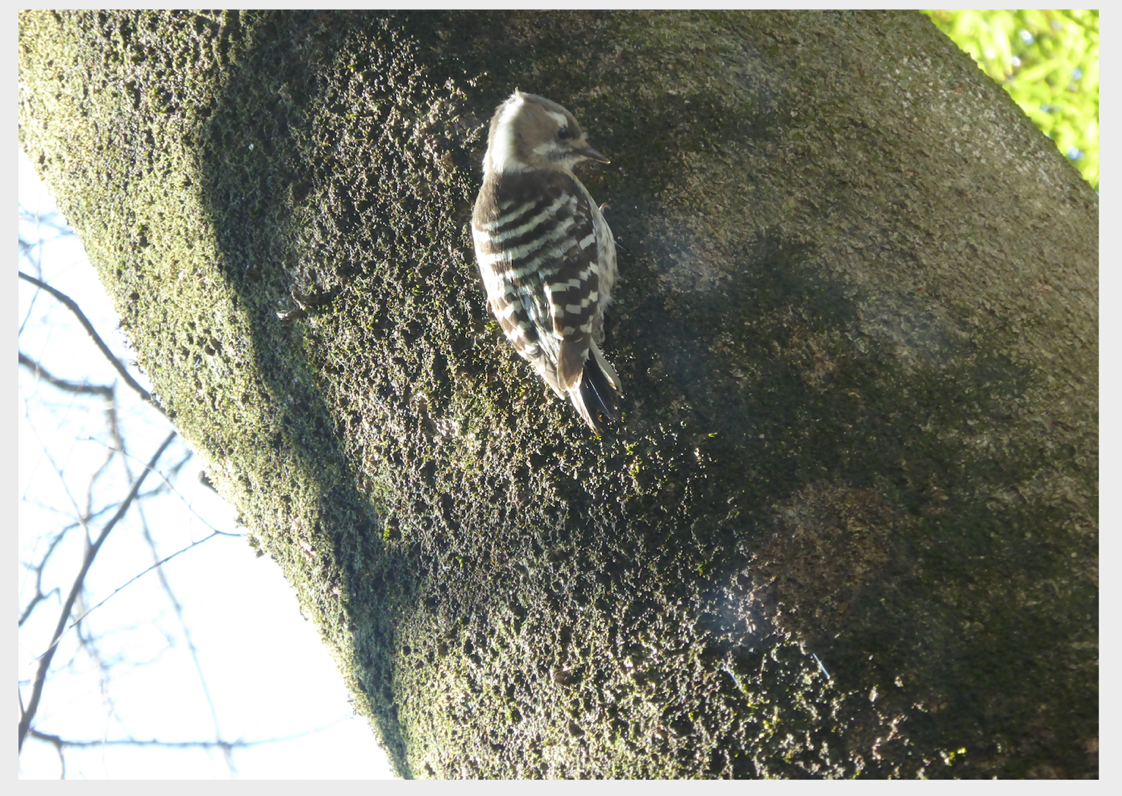


**Extended** **data Figure 2-a,** The Japanese pygmy woodpecker (*Dendrocopos kizuki*), body size 13-15 centimetres.


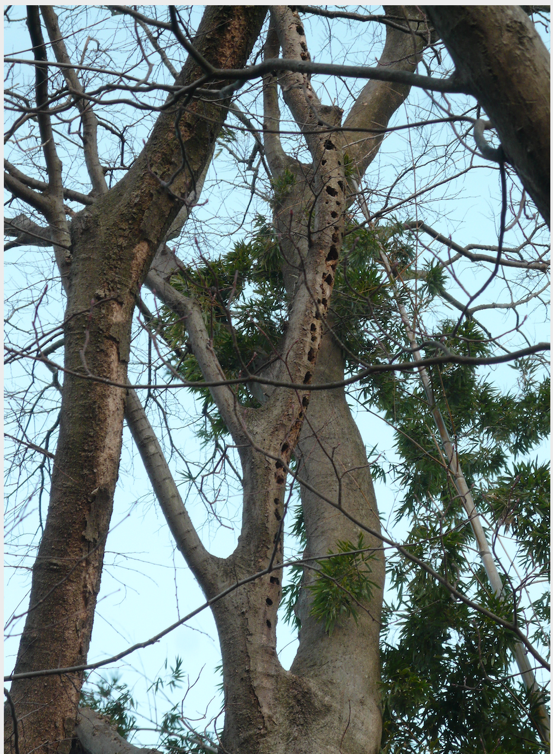


**Extended** **data Figure 2-b,** The hackberry tree with holes excavated by woodpeckers.


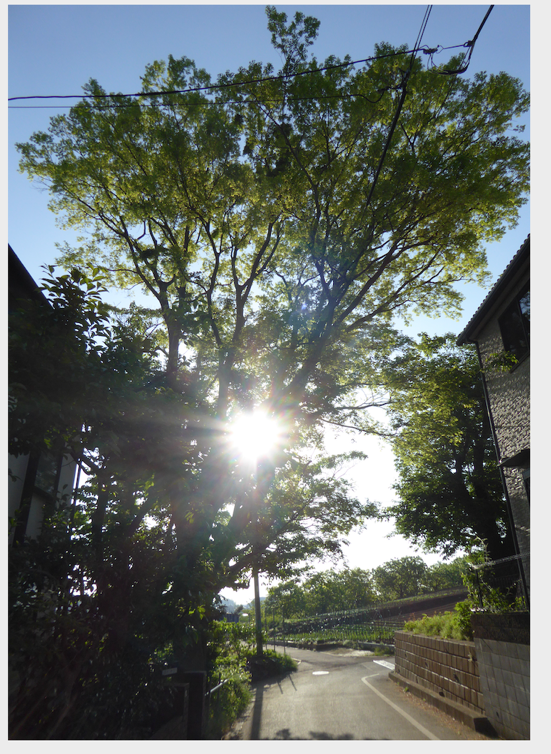


**Extended** **data Figure 2-c,** The hackberry tree (left side of the road), which was cut down in 2016, and the cherry tree (right side of the road), which was removed in 2020. The pictures were taken on 15 February 2013, 26 March 2015, and 1 May 2015, respectively. Picture credit: Setsuko Onoda, Tokyo


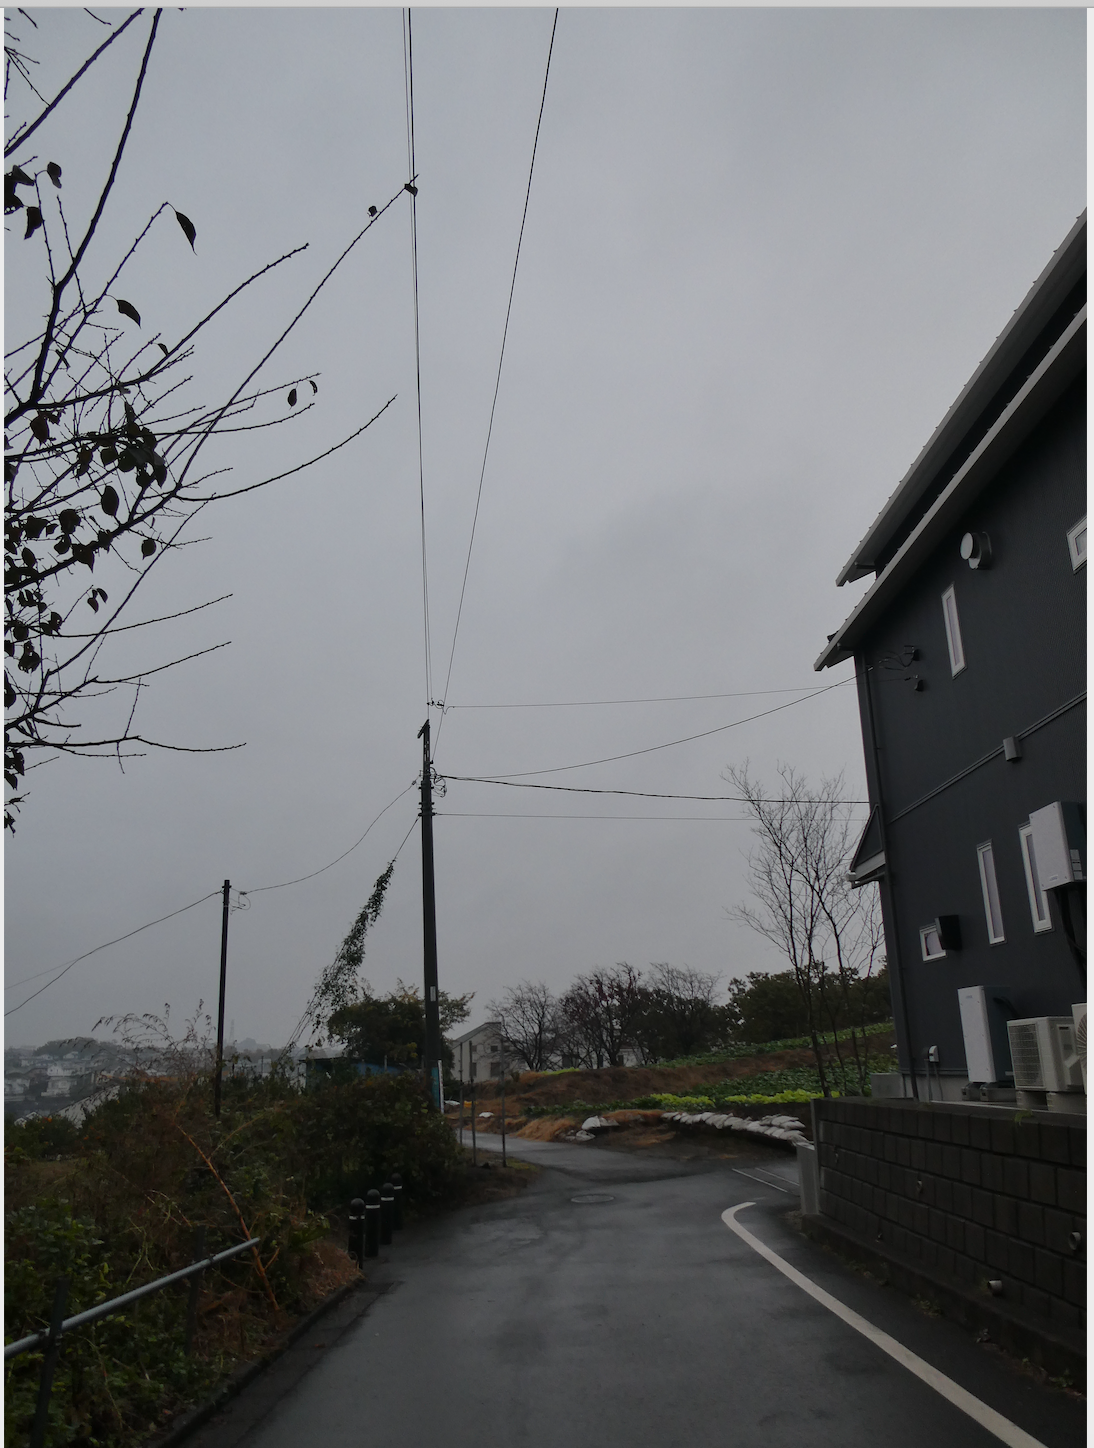


**Extended** **data Figure 3: Picture of the landscape after removal of the Hackberry tree and the cherry tree.**
